# Supplementary material for: Single-cell analysis of patient-derived PDAC organoids reveals cell state heterogeneity and a conserved developmental hierarchy
Source: PubMed Central journal article supplement (PMC8492851; doi:10.1038/s41467-021-26059-4), 2021-10-05
Supplement: 41467_2021_26059_MOESM1_ESM.pdf [file 41467_2021_26059_MOESM1_ESM.pdf]

Supplementary Material

## **Single-cell analysis of patient-derived PDAC organoids reveals cell state heterogeneity and a conserved developmental hierarchy**

Teresa G Krieger<sup>1,2,†</sup>, Solange Le Blanc<sup>3,4,5,†</sup>, Julia Jabs<sup>2,†</sup>, Foo Wei Ten<sup>1,2</sup>, Naveed Ishaque<sup>1</sup>, Katharina Jechow<sup>1,2</sup>, Olivia Debnath<sup>1</sup>, Carl-Stephan Leonhardt<sup>3</sup>, Anamika Giri<sup>2</sup>, Roland Eils<sup>1,2,\*</sup>, Oliver Strobel<sup>3,5,6,\*</sup>, Christian Conrad<sup>1,2,\*</sup>

<sup>1</sup>Digital Health Center, Berlin Institute of Health (BIH)/Charité-Universitätsmedizin Berlin, Berlin, Germany

<sup>2</sup>Division of Theoretical Bioinformatics, German Cancer Research Center (DKFZ), Heidelberg, Germany

<sup>3</sup>European Pancreas Center, Department of General Surgery, Heidelberg University Hospital, Heidelberg, Germany

<sup>4</sup>Division of Molecular Oncology of Gastrointestinal Tumors, German Cancer Research Center (DKFZ), Heidelberg, Germany

<sup>5</sup>National Center for Tumor diseases (NCT), Heidelberg, Germany

<sup>6</sup>Division of Visceral Surgery, Department of General Surgery, Medical University of Vienna, Vienna, Austria

† These authors contributed equally.

\* These authors jointly supervised this work.

## Supplementary Figure 1: Single-cell RNA sequencing of PDAC organoids

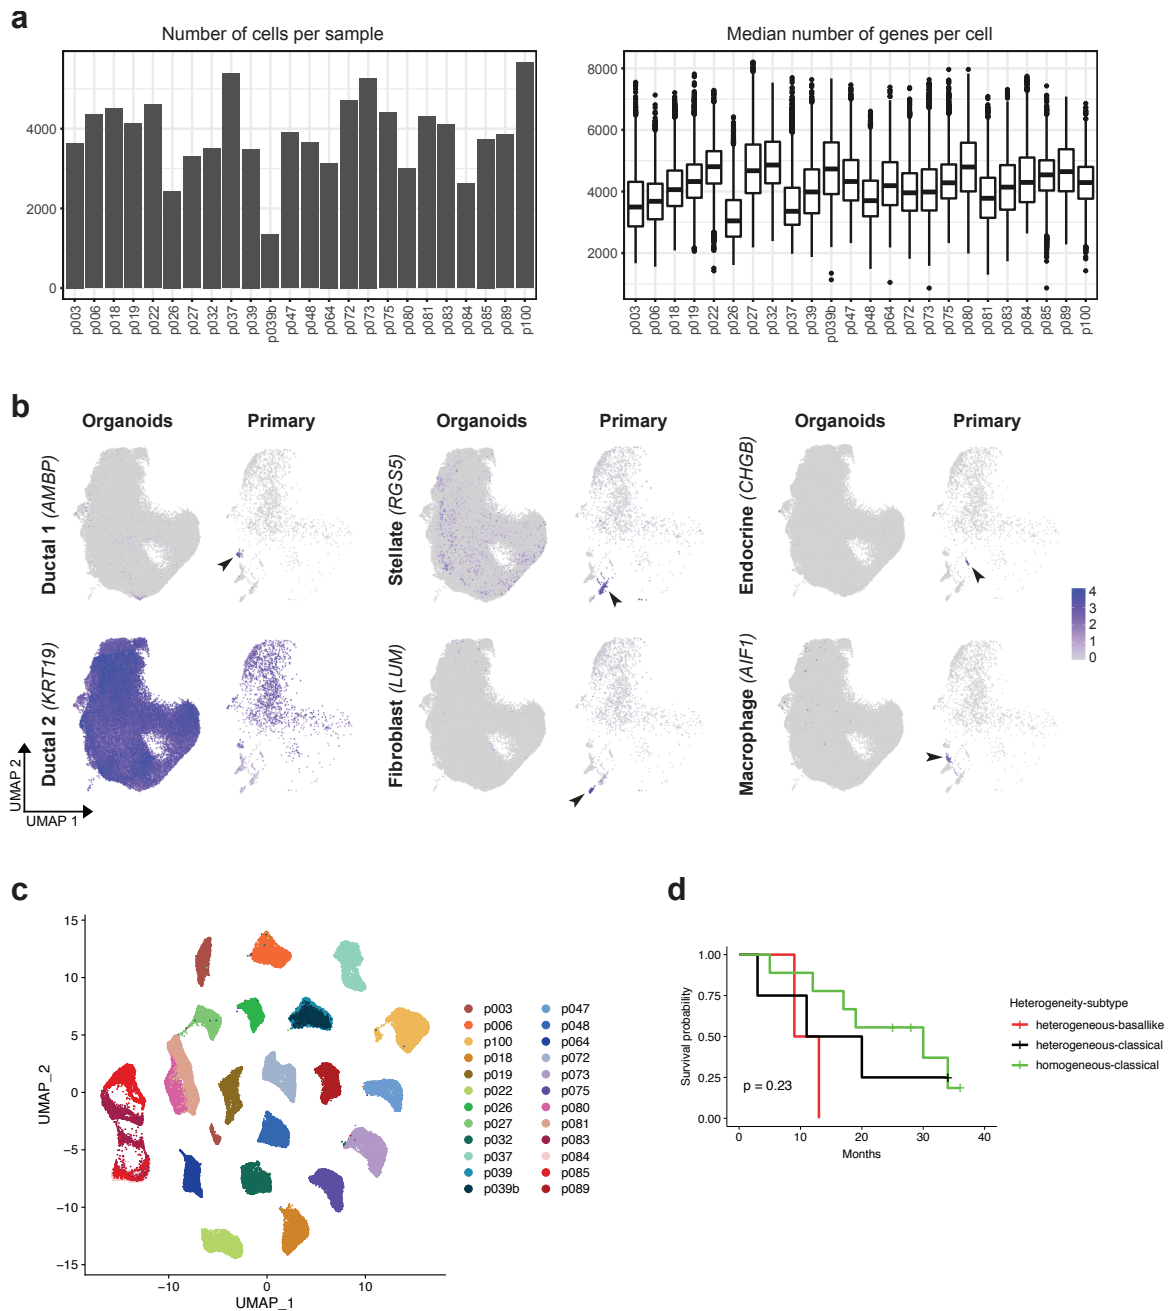

**a)** The bar plot indicates the number of cells ( $n$ ) per sample across the PDAC organoid scRNA-seq dataset. The box plot indicates the median number of genes per cell (centre: median, lower and upper hinges: first and third quartiles, whiskers: largest and smallest values no further than 150% of the inter-quartile range from the hinges, points: data beyond whiskers plotted individually as outliers).

**b)** Single-cell expression of cell type marker genes in PDAC organoid cells (left) and cells from primary PDAC biopsies (right). Arrowheads indicate gene expression in small subsets of cells in primary PDAC samples, but not in organoids.

**c)** UMAP embedding of 24 scRNA-seq samples from 18 patients, after removal of known expression quantitative trait loci from histologically normal pancreatic tissue samples or PDAC tumor-derived tissue samples <sup>1</sup> from the analysis. As also shown in Figure 1c, cells cluster by patient origin (p039 is a technical replicate of p039b, p080 is a biological replicate of p081, p084 and p085 are liver metastases matched to p083).

**d)** Kaplan-Meier curve for our cohort, split by PDAC subtype and heterogeneity. Homogeneous classical tumor patients tended to have a better outcome whereas the outcome of basal-like tumors tended to be poorest. While this result is not statistically significant (p=0.23, log-rank test), reflecting that the size of our cohort is insufficient for population-based analyses, it is consistent with previous reports from larger cohorts <sup>2,3,4,5</sup>.

## Supplementary Figure 2: Distinct cell states in PDAC

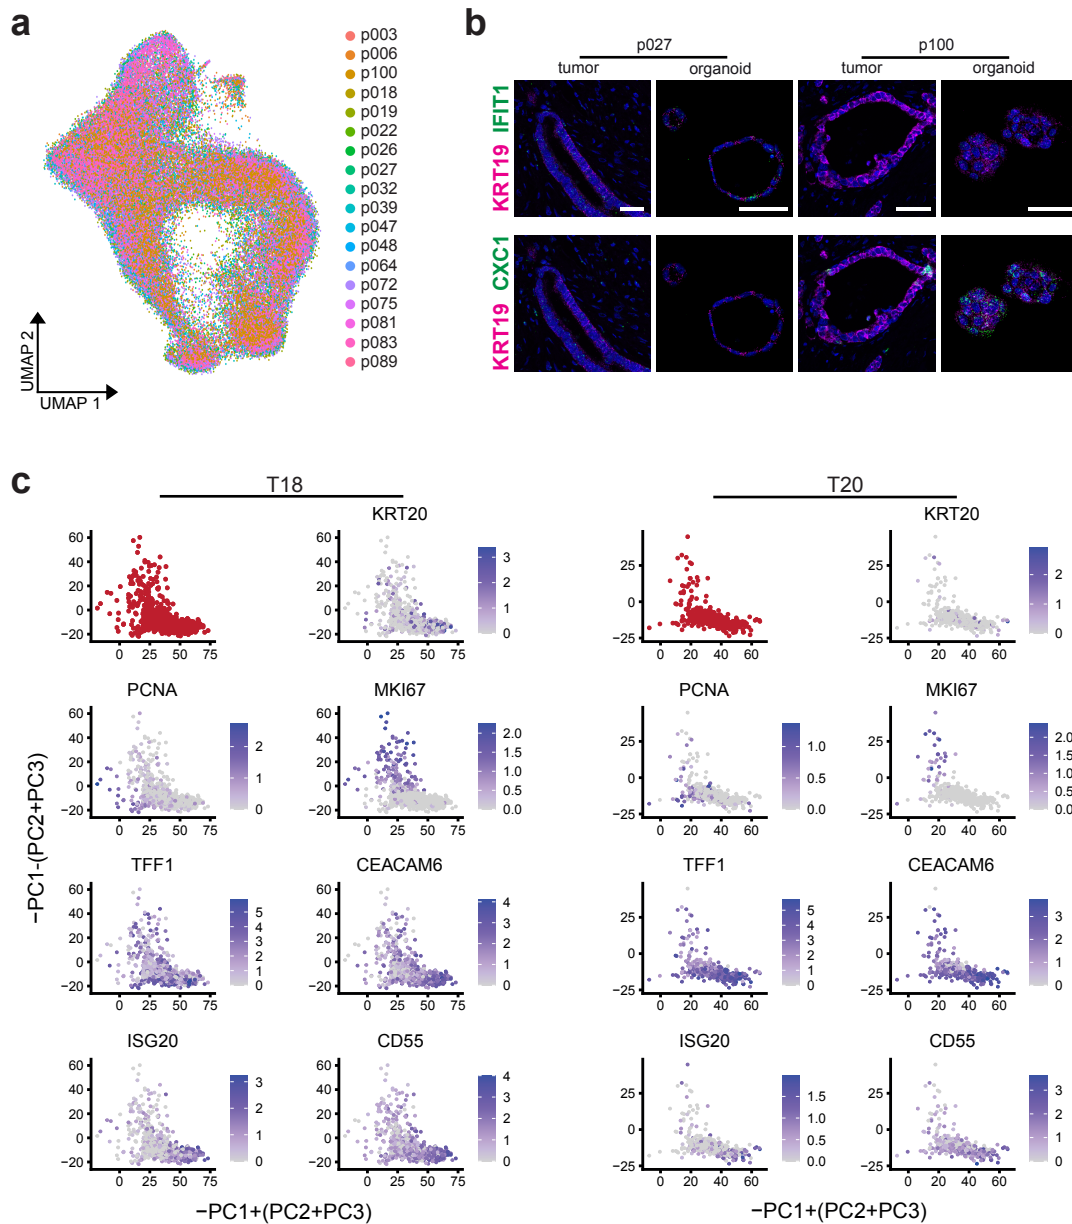

**a)** UMAP representation of PDAC transcriptomes from 18 primary PDAC organoid lines, after PCA-based integration. Colors indicate sample identity.

**b)** Representative images of RNA-FISH staining for KRT19 (magenta) together with either IFIT1 or CXC1 (green) in sections from organoids and primary tumours from p027 and p100. Nuclei are stained with DAPI (blue). Scale bars, 50  $\mu$ m. FISH staining was repeated twice on individual sections with similar results.

**c)** Projection of scRNA-seq data from primary PDAC samples T18 and T20, published previously<sup>6</sup>, onto the same linear combination of principal components as presented in Figure 4f (red). Expression of genes characteristic for cycling and differentiating cells is also shown.

### Supplementary Figure 3: Cycling and differentiating cells in PDAC organoids and metastases

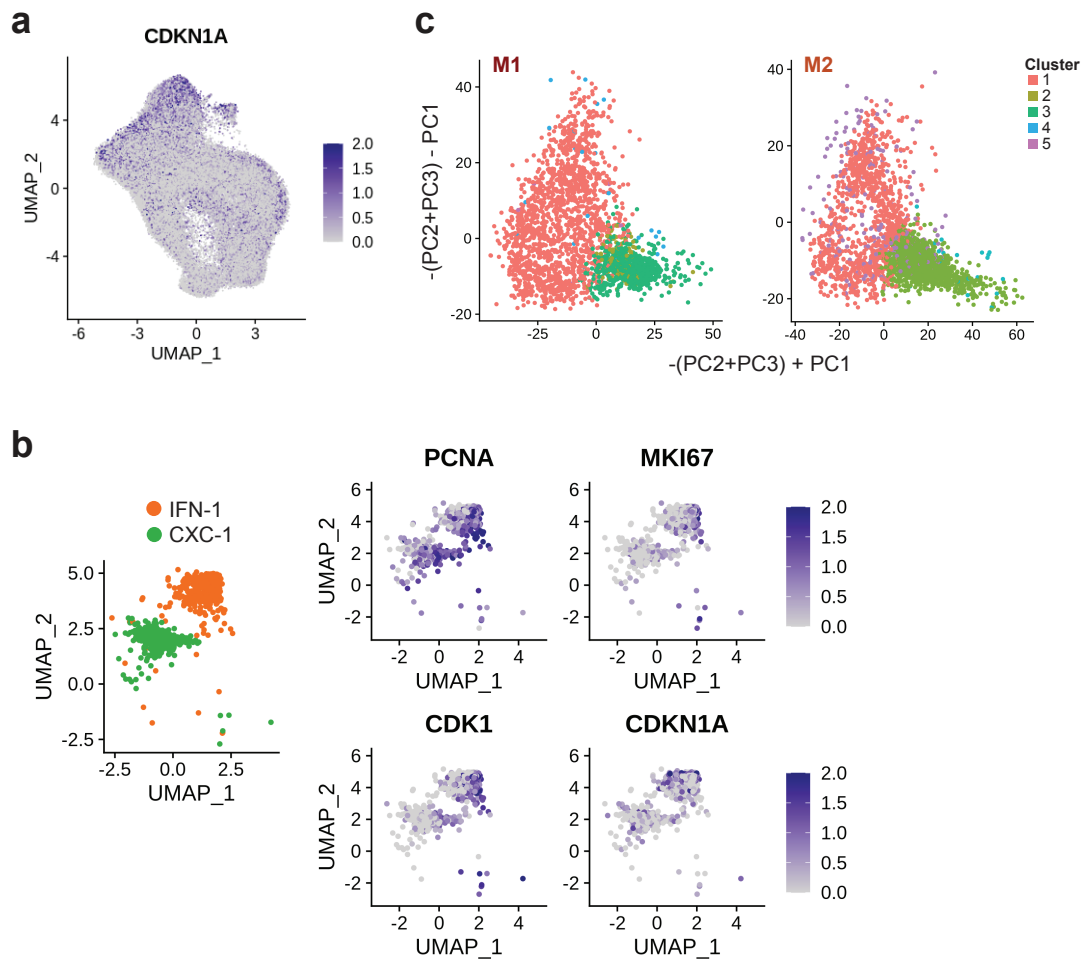

**a)** Expression of CDKN1A (coding for p21) across all primary PDAC organoids. The UMAP representation shown here is the same as in Figure 3c.

**b)** For clarity, clusters IFN-1 and CXC-1 are depicted without the other clusters, using the same UMAP representation as above (left). Expression of cell cycle related genes across these clusters indicates that they contain both cycling and quiescent cells (right).

**c)** Projection of M1 and M2 transcriptomes onto the primary PDAC organoid data (see Figure 4f and Methods) shows distribution of cells across the functional clusters identified in metastases (see Figure 5a).

## Supplementary Figure 4: Drug responses of PDAC organoids

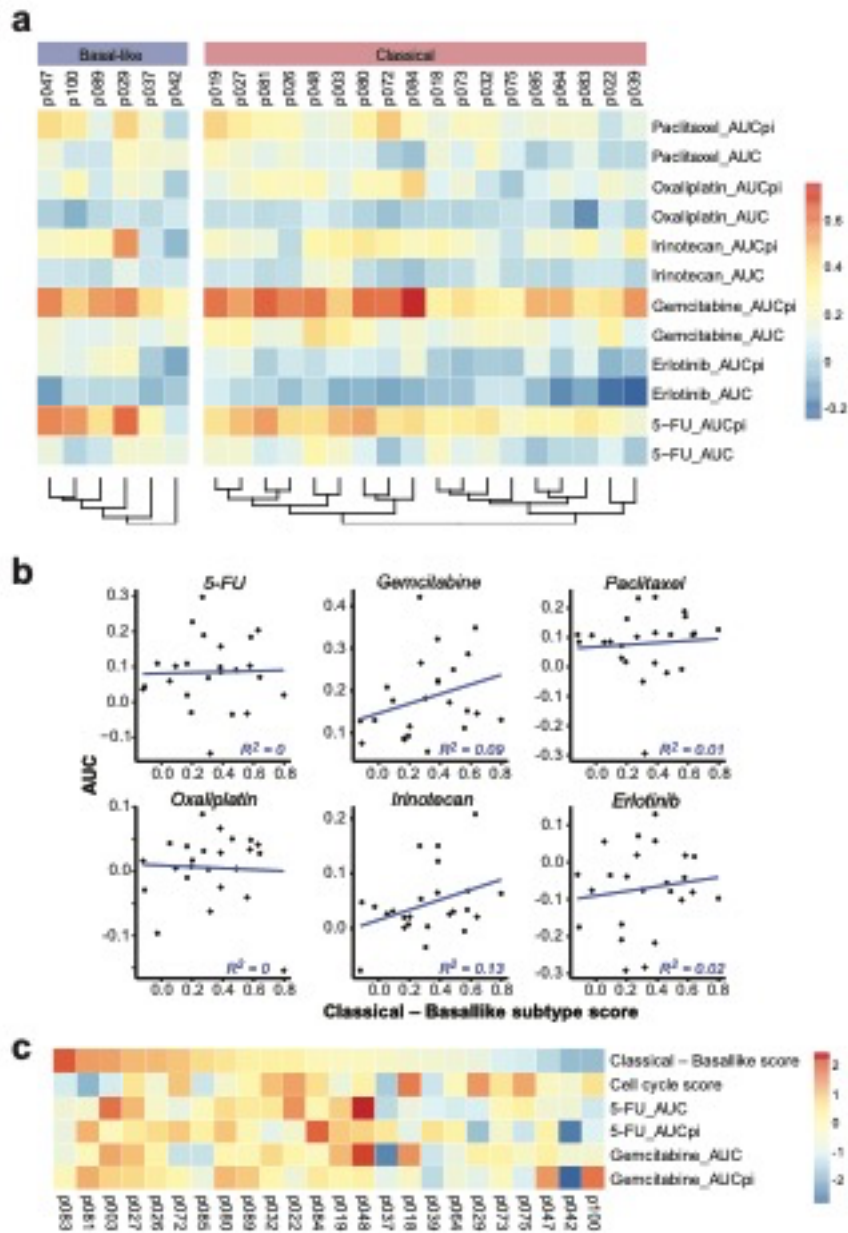

**a)** Drug response as measured by the area under curve for cell death (AUC) and proliferation inhibition (AUCpi) after 72 hours of treatment, for six different drugs in clinical use. Trees represent hierarchical clustering results for ‘classical’ and ‘basal-like’ PDAC organoid lines separately.

**b)** Correlation between median subtype scores calculated from scRNA-seq data and drug-induced cell death, as measured by the area under curve (AUC), for 24 PDAC organoid lines. A higher score on the x axis represents a more ‘classical’ transcriptional phenotype.

**c)** Overview of variation in transcriptomic PDAC subtype, median cell cycle score, as well as cell death (AUC) and proliferation inhibition (AUCpi) as measured by the area under curve in response to 5-FU or gemcitabine treatment, shown as z-scores scaled across all samples.

**Supplementary Table 1: Sample information**

| ID      | Sample | Location          | Morphology    | Grading | IPMN context | Chemo-therapy | KRAS mutation | Bulk RNA-seq    |                  |                           |                           | Bulk RNA-seq based subtype assignment for original tumors |
|---------|--------|-------------------|---------------|---------|--------------|---------------|---------------|-----------------|------------------|---------------------------|---------------------------|-----------------------------------------------------------|
|         |        |                   |               |         |              |               |               | Classical score | Basal-like score | Moffitt subtype (2-class) | Moffitt subtype (3-class) |                                                           |
| pdac03  | p003   | Tail              | hollow        | G3      | NO           | NO            | Q61H          | 0.0089515       | 0.0043576        | Classical                 | Classical                 | NA                                                        |
| pdac06  | p006   | Head              | hollow+filled | G3      | YES          | NO            | G12D          | NA              | NA               | NA                        | NA                        | NA                                                        |
| pdac18  | p018   | Tail              | multLum       | G3      | NO           | NO            | G12V          | 0.0088198       | 0.0026988        | Classical                 | Classical                 | NA                                                        |
| pdac19  | p019   | Tail              | hollow        | G2      | NO           | NO            | G12V          | 0.009439        | 0.0024683        | Classical                 | Classical                 | NA                                                        |
| pdac22  | p022   | HeadBody          | mixed         | G4      | NO           | NO            | G12R          | 0.0090398       | 0.002465         | Classical                 | Classical                 | Classical                                                 |
| pdac26  | p026   | Head              | multLum       | G2      | NO           | NO            | G12D          | 0.0093641       | 0.003476         | Classical                 | Classical                 | NA                                                        |
| pdac27  | p027   | Head              | hollow        | G2      | NO           | NO            | G12V          | 0.0086201       | 0.0038162        | Classical                 | Classical                 | Classical                                                 |
| pdac32  | p032   | Tail              | hollow        | G3      | NO           | NO            | G12D          | 0.0079825       | 0.0040549        | Classical                 | Classical                 | Classical                                                 |
| pdac37  | p037   | PeripancreaticMet | mixed         | NA      | YES          | YES           | G12D          | 0.0049682       | 0.0064576        | Basal-like                | Basal-like                | Basal-like                                                |
| pdac39  | p039   | Head              | mixed         | G2      | NO           | NO            | G12R          | 0.0076139       | 0.0040019        | Classical                 | Classical                 | NA                                                        |
| pdac47  | p047   | Head              | hollow        | G3      | NO           | NO            | G12V          | 0.0057914       | 0.0069626        | Basal-like                | Intermediate              | Basal-like                                                |
| pdac48  | p048   | Head              | mixed         | G3      | NO           | NO            | G12V          | 0.0086943       | 0.0041905        | Classical                 | Classical                 | NA                                                        |
| pdac64  | p064   | Head              | multLum       | NA      | NO           | YES           | G12V          | 0.0069608       | 0.0037311        | Classical                 | Classical                 | NA                                                        |
| pdac72  | p072   | HeadBodyTail      | mixed         | NA      | NO           | YES           | G12R          | 0.0084005       | 0.0039216        | Classical                 | Classical                 | NA                                                        |
| pdac73  | p073   | PeritonealMet     | multLum       | NA      | YES          | NO            | G12V          | 0.0078166       | 0.0040776        | Classical                 | Classical                 | NA                                                        |
| pdac75  | p075   | Body              | mixed         | NA      | NO           | YES           | G12R          | 0.0063818       | 0.004835         | Classical                 | Classical                 | NA                                                        |
| pdac89  | p089   | Head              | hollow        | G3      | NO           | NO            | G12D          | 0.0052747       | 0.0076665        | Basal-like                | Intermediate              | NA                                                        |
| pdac80  | p080   | Head              | hollow        | G2      | NO           | NO            | G12R          | 0.0090161       | 0.0032927        | Classical                 | Classical                 | NA                                                        |
| pdac81  | p081   | Head              | hollow        | G2      | NO           | NO            | G12R          | 0.0108247       | 0.0011815        | Classical                 | Classical                 | Classical                                                 |
| pdac83  | p083   | Tail              | mixed         | G2      | NO           | NO            | G12D          | 0.0112192       | 0.0013463        | Classical                 | Classical                 | Classical                                                 |
| pdac84  | p084   | LiverMet          | mixed         | NA      | NO           | NO            | G12D          | 0.0086887       | 0.0024852        | Classical                 | Classical                 | Classical                                                 |
| pdac85  | p085   | LiverMet          | multLum       | NA      | NO           | NO            | G12D          | 0.0087596       | 0.0039757        | Classical                 | Classical                 | NA                                                        |
| pdac100 | p100   | Head              | filled        | G3      | NO           | NO            | G12V          | 0.0032967       | 0.0097682        | Basal-like                | Basal-like                | Basal-like                                                |

pdac81, pdac83 and pdac84 were derived from the same patient.

pdac80 and pdac81 were derived from the same patient.

Samples were derived from 8 male and 12 female patients.

## Supplementary Table 2: Patient-specific genes

Top 20 patient-specific genes (with log[fold change]>0.25 and adjusted p-value<0.001), as shown in Figure 1d.

| #  | p003   | p006    | p018         | p019     | p022      | p026         | p027     | p032     | p039     | p047    | p048     | p064     | p072     | p075     | p081    | p083          | p089     | p100     |
|----|--------|---------|--------------|----------|-----------|--------------|----------|----------|----------|---------|----------|----------|----------|----------|---------|---------------|----------|----------|
| 1  | MUC5B  | LCN2    | DDIT4        | CA9      | LDHB      | HIST1H1C     | MMMP1    | CLDN3    | OLFM4    | CST6    | ORM1     | AKR1C4   | KRT13    | PON2     | FABP1   | RP11-1143G9.4 | LY6D     | S100A9   |
| 2  | TFF2   | LYZ     | TMEM54       | TPM2     | SERPINA1  | HIST1H2BK    | LCN2     | BMP4     | RNASE1   | ALPL2   | RPS4Y1   | MAGEA4   | RPS4Y1   | MCM7     | PRSS1   | TFF1          | CD70     | S100A2   |
| 3  | TFF3   | SNCG    | ANXA13       | PLA2G2A  | LINC00665 | TM4SF4       | PIGR     | FAM3D    | HLA-B    | MMP7    | LTB      | MAGEA3   | HSBP11   | TRIP6    | REG4    | RG55          | CEACAM5  | SPP1     |
| 4  | CDKN2A | ISG15   | ID1          | PRSS1    | HMGCS2    | LINC00152    | TFF2     | IDH2     | WFDC2    | RBP1    | PHGR1    | AKR1C3   | TESC     | POP7     | TM4SF20 | GSTM4         | PSCA     | SCGB1A1  |
| 5  | SCD    | TFF3    | CALB2        | JUN      | REG4      | SPINK1       | DMBT1    | PPAP2C   | IFITM3   | IFI27   | FABP1    | AKR1C2   | REG4     | ACN9     | TFF1    | LYZ           | KRT20    | NTS      |
| 6  | TFF1   | ALDH1A1 | EIF4EBP1     | EDN1     | CAPNS1    | JUND         | MTRNR2L8 | SLC12A2  | CXCL17   | IFI6    | DLD      | MAGEA6   | CTSE     | GNB2     | CBS     | PGC           | KLK6     | KRT23    |
| 7  | PSCA   | ZG16B   | PSAT1        | CTTN     | CLDN2     | MT1X         | LYPD2    | MTRNR2L1 | PLAT     | DKK1    | GSTM3    | CES1     | AQP5     | TSC22D4  | CD55    | TFF2          | JUNB     | KRT15    |
| 8  | CLIC3  | LYPD2   | TMEM45B      | MT1E     | GAL       | HIST1H2BJ    | LYZ      | CEACAM5  | MMP7     | ISG15   | CDKN2A   | AKR1B10  | TXNL4A   | TAF6     | MUC13   | ANPEP         | GABRP    | FGFBP1   |
| 9  | ADIRF  | RPS4Y1  | PYCR1        | MYEOV    | CLDN18    | AC006262.5   | MUC1     | SRD5A3   | HSPA1A   | MT2A    | CTNNBIP1 | CHCHD10  | FBP1     | PILRB    | PRSS3   | CA2           | ARHGDI3  | CSTA     |
| 10 | CAP5   | CDKN2A  | NT5C         | SPINK4   | RRP7A     | MUC5AC       | CD74     | PPP1R1B  | NGFRAP1  | HPGD    | CXCL3    | PI3      | SVT8     | BAIAP2L1 | PI3     | KLK1          | LDHB     | S100A8   |
| 11 | XIST   | MUC5B   | CLDN3        | ACTL8    | SYNE4     | SMIM22       | LGALS2   | STXBP6   | RARRES3  | LYPD2   | EMG1     | C12orf75 | TMEM176B | IFITM2   | MRPS31  | AKR1B10       | NR4A1    | CALB1    |
| 12 | LGALS1 | AKR1C3  | GSTM3        | OLFM4    | MTHFS     | C8orf59      | HLA-DRA  | GMDS     | BPIFB1   | KLK6    | ARL14    | MIB2     | ADIRF    | SLC25A13 | PHGR1   | TFF3          | TCN1     | ALDH3A1  |
| 13 | UPK3B  | CAPS    | ID3          | FADD     | PSENNEN   | MIR4435-1HG  | VSIG2    | GCNT3    | HIF1A    | ANXA3   | EEF1E1   | CSAG1    | TFF2     | CPSF4    | ELF1    | REG4          | PLAT     | KRT5     |
| 14 | AQP5   | PI3     | KRTCAP3      | ERRFI1   | UPK1B     | ARL14        | MUC13    | KLK6     | PRSS21   | F3      | IL1R2    | RARRES1  | PEPD     | ANXA1    | CEACAM5 | GMDS          | CEACAM6  | AQP3     |
| 15 | ASRGL1 | AQP5    | IDH2         | BTG1     | RBM42     | KLF2         | CDC42EP1 | PLIN2    | DMBT1    | LY6D    | BIRC3    | MAGEA10  | CLTB     | ATF3     | TRIM31  | SELM          | CDKN1A   | KRT6A    |
| 16 | IGFBP7 | MUC1    | SLC22A18     | MCL1     | SHKBP1    | CLDN18       | HLA-DRB1 | KRT6B    | CD74     | HLA-B   | MRPS18C  | G6PD     | IMPA2    | DBF4     | WBP4    | SULT1C2       | PLBD1    | GLUL     |
| 17 | BTBD16 | CRIP2   | SLC3A2       | KLF6     | KDELR3    | RHOB         | TCEA3    | MRPL15   | IFITM2   | BST2    | CALB2    | CLDN3    | TUBA4A   | MOSPD3   | MIPEP   | AKR7A3        | GCNT3    | MIR205HG |
| 18 | TM4SF5 | RSPH1   | PLEK2        | HIST1H1C | CDKN2A    | RP11-462G2.1 | FOS      | LCN2     | SERPINA1 | KLK10   | TPD52    | TM4SF20  | KRT20    | CYR61    | IFITM2  | IL1R2         | LGMN     | DHRS9    |
| 19 | FBXO2  | SLC12A2 | GSTO2        | RHOB     | QPRT      | MT1E         | TMC5     | TPM2     | IFI27L2  | RARRES3 | SMIM20   | PGD      | PXMP2    | KRT20    | ABHD3   | CES2          | PPP1R15A | SLPI     |
| 20 | DPYSL2 | RARRES3 | RP11-345J4.5 | RBP4     | CYB5R3    | SFTA2        | CRIP2    | PHLDA1   | GSTA1    | CAV1    | PRSS21   | CES2     | TMEM176A | CTGF     | L32     | OTC           | LIPC     | ADIRF    |



**Supplementary Table 3: Moffitt subtype and heterogeneity scores**

Moffitt subtype and heterogeneity scores based on scRNA-seq for PDAC organoids derived from primary tumors

| <b>ID</b> | <b>Sample</b> | <b>Basal-like score</b> | <b>Classical score</b> | <b>Heterogeneity class</b> | <b>Moffitt subtype</b> | <b>Grading</b> |
|-----------|---------------|-------------------------|------------------------|----------------------------|------------------------|----------------|
| pdac03    | p003          | 0.008241758             | 0.991758242            | homogeneous                | classical              | G3             |
| pdac06    | p006          | 0.009630819             | 0.990369181            | homogeneous                | classical              | G3             |
| pdac18    | p018          | 0.088928413             | 0.911071587            | homogeneous                | classical              | G3             |
| pdac19    | p019          | 0.070736434             | 0.929263566            | homogeneous                | classical              | G2             |
| pdac22    | p022          | 0.063488624             | 0.936511376            | heterogeneous              | classical              | G4             |
| pdac26    | p026          | 0.061140747             | 0.938859253            | homogeneous                | classical              | G2             |
| pdac27    | p027          | 0.005461165             | 0.994538835            | homogeneous                | classical              | G2             |
| pdac32    | p032          | 0.033864542             | 0.966135458            | heterogeneous              | classical              | G3             |
| pdac39    | p039          | 0.16824305              | 0.83175695             | homogeneous                | classical              | G2             |
| pdac47    | p047          | 0.615404299             | 0.384595701            | heterogeneous              | basallike              | G3             |
| pdac48    | p048          | 0.106732348             | 0.893267652            | homogeneous                | classical              | G3             |
| pdac64    | p064          | 0.166189112             | 0.833810888            | homogeneous                | classical              | NA             |
| pdac72    | p072          | 0.00995341              | 0.99004659             | homogeneous                | classical              | NA             |
| pdac75    | p075          | 0.40199637              | 0.59800363             | heterogeneous              | classical              | NA             |
| pdac81    | p081          | 0.002322341             | 0.997677659            | homogeneous                | classical              | G2             |
| pdac83    | p083          | 0.016581322             | 0.983418678            | homogeneous                | classical              | G2             |
| pdac89    | p089          | 0.032509753             | 0.967490247            | heterogeneous              | classical              | G3             |
| pdac100   | p100          | 0.810901394             | 0.189098606            | heterogeneous              | basallike              | G3             |

### Supplementary Table 4: Cluster-specific genes

Top 20 differentially expressed genes for all clusters  
(with  $\log[\text{fold change}] > 0.25$  and adjusted p-value  $< 0.001$ )

| Clusters |           |           |           |           |           |              |              |         |         |
|----------|-----------|-----------|-----------|-----------|-----------|--------------|--------------|---------|---------|
| #        | Cycling-1 | Cycling-2 | Cycling-3 | Cycling-4 | Cycling-5 | Noncycling-1 | Noncycling-2 | IFN-1   | CXC-1   |
| 1        | PCNA      | HIST1H4C  | UBE2C     | CCNB1     | PTTG1     | LYZ          | PHGR1        | ISG15   | CXCL1   |
| 2        | GINS2     | RRM2      | KPNA2     | CDC20     | CDC20     | ALDH1A1      | PSCA         | OASL    | CXCL3   |
| 3        | MCM7      | CDK1      | CDK1      | CKS2      | HMG2      | SLC12A2      | TFF1         | IFIT3   | CXCL2   |
| 4        | MCM3      | KIAA0101  | CCNB1     | PTTG1     | CDKN3     | TFF3         | C15orf48     | IFIT2   | NFKBIA  |
| 5        | FEN1      | HMGB2     | UBE2S     | CCNB2     | CCNB1     | RNASE1       | SDCBP2       | ISG20   | IL8     |
| 6        | MCM5      | ZWINT     | CKS2      | AURKA     | BIRC5     | MUC5B        | TM4SF4       | RARRES3 | CCL20   |
| 7        | SLBP      | UBE2T     | PLK1      | UBE2S     | CCNB2     | AQP5         | IL32         | IFIT1   | BIRC3   |
| 8        | MCM6      | MCM7      | CDC20     | CDKN3     | STMN1     | CAPS         | CEACAM5      | ZC3HAV1 | ZC3H12A |
| 9        | DUT       | TK1       | TOP2A     | CENPF     | ILF2      | OLFM4        | CEACAM6      | PMAIP1  | TNFAIP2 |
| 10       | UNG       | DUT       | HMGB2     | PLK1      | HNRNPH3   | TFF2         | ISG20        | HERC5   | IER3    |

**Supplementary Table 5: Number of cells represented in each cluster for each patient**

| ID      | Sample | Cluster   |           |           |           |           |              |              |       |       |
|---------|--------|-----------|-----------|-----------|-----------|-----------|--------------|--------------|-------|-------|
|         |        | Cycling-1 | Cycling-2 | Cycling-3 | Cycling-4 | Cycling-5 | Noncycling-1 | Noncycling-2 | IFN-1 | CXC-1 |
| pdac03  | p003   | 549       | 234       | 188       | 89        | 426       | 1057         | 919          | 5     | 26    |
| pdac06  | p006   | 486       | 220       | 270       | 108       | 690       | 1425         | 753          | 217   | 35    |
| pdac18  | p018   | 798       | 889       | 822       | 201       | 611       | 396          | 485          | 65    | 31    |
| pdac19  | p019   | 696       | 365       | 392       | 137       | 551       | 1090         | 777          | 9     | 28    |
| pdac22  | p022   | 756       | 705       | 663       | 396       | 826       | 609          | 488          | 14    | 23    |
| pdac26  | p026   | 475       | 261       | 239       | 76        | 317       | 415          | 433          | 9     | 15    |
| pdac27  | p027   | 628       | 377       | 334       | 106       | 438       | 627          | 470          | 75    | 29    |
| pdac32  | p032   | 694       | 461       | 486       | 209       | 575       | 463          | 300          | 35    | 26    |
| pdac39  | p039   | 509       | 367       | 319       | 122       | 528       | 923          | 624          | 15    | 15    |
| pdac47  | p047   | 774       | 399       | 351       | 162       | 683       | 602          | 638          | 116   | 29    |
| pdac48  | p048   | 574       | 414       | 420       | 151       | 654       | 745          | 459          | 0     | 18    |
| pdac64  | p064   | 637       | 446       | 279       | 65        | 405       | 596          | 380          | 0     | 48    |
| pdac72  | p072   | 1047      | 655       | 586       | 212       | 645       | 797          | 660          | 36    | 0     |
| pdac75  | p075   | 906       | 750       | 578       | 234       | 742       | 526          | 430          | 36    | 38    |
| pdac81  | p081   | 588       | 431       | 349       | 95        | 332       | 1159         | 1095         | 7     | 31    |
| pdac83  | p083   | 662       | 351       | 449       | 194       | 564       | 1065         | 609          | 1     | 38    |
| pdac89  | p089   | 552       | 385       | 466       | 146       | 499       | 917          | 519          | 70    | 20    |
| pdac100 | p100   | 1251      | 639       | 809       | 213       | 957       | 966          | 414          | 51    | 57    |

**Supplementary Table 6: Drug screen results**

| Organoid line | Drug        | LD50 (nM)   | AUC        | AUCpi      |
|---------------|-------------|-------------|------------|------------|
| p003          | 5-FU        | 38548.70117 | 0.20348353 | 0.48076149 |
| p003          | Erlotinib   | >50000      | -0.0809063 | 0.08393479 |
| p003          | Gemcitabine | 23.50963641 | 0.34870862 | 0.44527196 |
| p003          | Irinotecan  | 392.9005332 | 0.20790709 | 0.33156701 |
| p003          | Oxaliplatin | 9328.213107 | 0.04123505 | 0.12885448 |
| p003          | Paclitaxel  | 16.88867821 | 0.10898313 | 0.1619454  |
| p018          | 5-FU        | 448.7449095 | 0.22683951 | 0.32393168 |
| p018          | Erlotinib   | >50000      | -0.0386579 | -0.005846  |
| p018          | Gemcitabine | 71.31801182 | 0.11525907 | 0.33244749 |
| p018          | Irinotecan  | >10000      | 0.02086252 | 0.28995562 |
| p018          | Oxaliplatin | >100000     | 0.01695898 | 0.09993713 |
| p018          | Paclitaxel  | 0.974763298 | 0.16314415 | 0.14650774 |
| p019          | 5-FU        | >1000000    | 0.18944375 | 0.38341918 |
| p019          | Erlotinib   | >50000      | 0.07124501 | 0.10980103 |
| p019          | Gemcitabine | 6.6023902   | 0.26534173 | 0.60793596 |
| p019          | Irinotecan  | 1677.586744 | 0.05361906 | 0.22168002 |
| p019          | Oxaliplatin | >100000     | 0.03155313 | 0.12951181 |
| p019          | Paclitaxel  | 2.814887155 | 0.2329745  | 0.43378279 |
| p022          | 5-FU        | >1000000    | 0.09902425 | 0.27659361 |
| p022          | Erlotinib   | >50000      | -0.2177626 | -0.070515  |
| p022          | Gemcitabine | 4.801560958 | 0.32198008 | 0.39532269 |
| p022          | Irinotecan  | 3456.790846 | 0.06483179 | 0.1198497  |
| p022          | Oxaliplatin | >100000     | 0.06674479 | 0.19057898 |
| p022          | Paclitaxel  | >500        | 0.01332512 | 0.04394495 |
| p026          | 5-FU        | 440856.9126 | 0.10254431 | 0.41958057 |
| p026          | Erlotinib   | >50000      | -0.0413778 | 0.06837519 |
| p026          | Gemcitabine | 23.55937136 | 0.15190239 | 0.57408838 |
| p026          | Irinotecan  | 700.7689271 | 0.03385803 | 0.02623816 |
| p026          | Oxaliplatin | >100000     | 0.03365012 | 0.24723966 |
| p026          | Paclitaxel  | 3.046008316 | 0.18879533 | 0.26161886 |
| p027          | 5-FU        | 219635.2373 | 0.18389908 | 0.47454342 |
| p027          | Erlotinib   | >50000      | 0.01848314 | 0.13833455 |
| p027          | Gemcitabine | 16.65151833 | 0.28668723 | 0.52291025 |
| p027          | Irinotecan  | 2377.290411 | 0.06848224 | 0.17113535 |
| p027          | Oxaliplatin | >100000     | 0.04875948 | 0.20429066 |
| p027          | Paclitaxel  | >500        | 0.17154402 | 0.3473504  |
| p029          | 5-FU        | >1000000    | 0.10909178 | 0.23622962 |
| p029          | Erlotinib   | >50000      | -0.20924   | 0.00337301 |

|      |             |             |            |            |
|------|-------------|-------------|------------|------------|
| p029 | Gemcitabine | >5000       | 0.08732938 | 0.20248099 |
| p029 | Irinotecan  | >10000      | 0.01966243 | 0.25056006 |
| p029 | Oxaliplatin | >100000     | 0.03879516 | 0.33134523 |
| p029 | Paclitaxel  | >500        | 0.07231921 | 0.15248895 |
| p032 | 5-FU        | >1000000    | 0.1573822  | 0.3742463  |
| p032 | Erlotinib   | >50000      | 0.05767189 | -0.0111187 |
| p032 | Gemcitabine | 13.65404284 | 0.22326615 | 0.3398206  |
| p032 | Irinotecan  | 1821.885666 | 0.12220841 | 0.13570944 |
| p032 | Oxaliplatin | >100000     | 0.02874106 | 0.05952196 |
| p032 | Paclitaxel  | 5.766470248 | 0.23689854 | 0.2282412  |
| p037 | 5-FU        | >1000000    | -0.1449885 | 0.24641915 |
| p037 | Erlotinib   | >50000      | -0.2838531 | 0.13236281 |
| p037 | Gemcitabine | 15.50914877 | 0.05522769 | 0.53199888 |
| p037 | Irinotecan  | >10000      | 0.00335313 | 0.35460898 |
| p037 | Oxaliplatin | >100000     | -0.0625552 | 0.01580286 |
| p037 | Paclitaxel  | >500        | -0.2934191 | 0.18195803 |
| p039 | 5-FU        | >1000000    | -0.0291775 | 0.17002328 |
| p039 | Erlotinib   | >50000      | -0.2921333 | -0.0334412 |
| p039 | Gemcitabine | >5000       | 0.09240161 | 0.5433918  |
| p039 | Irinotecan  | >10000      | 0.00728908 | 0.34198607 |
| p039 | Oxaliplatin | >100000     | 0.00766854 | 0.13270278 |
| p039 | Paclitaxel  | >500        | 0.01714926 | 0.13193397 |
| p042 | 5-FU        | >1000000    | 0.03706548 | -0.0369554 |
| p042 | Erlotinib   | >50000      | -0.0332965 | -0.0949649 |
| p042 | Gemcitabine | 1.497948514 | 0.12827077 | 0.08081894 |
| p042 | Irinotecan  | >10000      | -0.0765865 | -0.0441032 |
| p042 | Oxaliplatin | >100000     | 0.01596835 | -0.0341358 |
| p042 | Paclitaxel  | 0.994572601 | 0.10940922 | -0.0582745 |
| p047 | 5-FU        | >1000000    | 0.10940477 | 0.56410072 |
| p047 | Erlotinib   | >50000      | -0.0759938 | -0.014399  |
| p047 | Gemcitabine | 71.8693769  | 0.12961415 | 0.49327084 |
| p047 | Irinotecan  | >10000      | 0.03921367 | 0.37015569 |
| p047 | Oxaliplatin | >100000     | -0.0965368 | -0.0065654 |
| p047 | Paclitaxel  | 3.753482456 | 0.1071899  | 0.28491396 |
| p048 | 5-FU        | >1000000    | 0.29688209 | 0.40106359 |
| p048 | Erlotinib   | >50000      | 0.01939404 | 0.03008693 |
| p048 | Gemcitabine | 7.803481663 | 0.4212718  | 0.5912397  |
| p048 | Irinotecan  | 1370.097964 | 0.15022347 | 0.29547151 |
| p048 | Oxaliplatin | 32727.04017 | 0.08888248 | 0.26922748 |
| p048 | Paclitaxel  | >500        | 0.10210168 | 0.13457331 |
| p064 | 5-FU        | >1000000    | 0.01972833 | 0.27607503 |
| p064 | Erlotinib   | >50000      | -0.1676786 | -0.0107646 |

|      |             |             |            |            |
|------|-------------|-------------|------------|------------|
| p064 | Gemcitabine | 21.38953294 | 0.08415512 | 0.49354293 |
| p064 | Irinotecan  | >10000      | 0.00130197 | 0.17945634 |
| p064 | Oxaliplatin | >100000     | -0.0100034 | 0.15258719 |
| p064 | Paclitaxel  | >500        | 0.03010797 | 0.19606931 |
| p072 | 5-FU        | >1000000    | -0.0322539 | 0.37550355 |
| p072 | Erlotinib   | >50000      | -0.1019458 | 0.05607649 |
| p072 | Gemcitabine | >5000       | 0.11113167 | 0.60792136 |
| p072 | Irinotecan  | >10000      | -0.0050741 | 0.31729172 |
| p072 | Oxaliplatin | >100000     | -0.0407986 | 0.2654126  |
| p072 | Paclitaxel  | >500        | -0.0079819 | 0.45374251 |
| p073 | 5-FU        | 575234.2675 | 0.10164677 | 0.3401449  |
| p073 | Erlotinib   | >50000      | -0.0348204 | -0.0437875 |
| p073 | Gemcitabine | 27.15242171 | 0.17610188 | 0.39588647 |
| p073 | Irinotecan  | >10000      | 0.03093332 | 0.21776111 |
| p073 | Oxaliplatin | >100000     | 0.00476662 | 0.1651609  |
| p073 | Paclitaxel  | 81.27059946 | 0.08529981 | 0.23918647 |
| p075 | 5-FU        | >1000000    | 0.05970846 | 0.21473405 |
| p075 | Erlotinib   | >50000      | 0.05590189 | -0.0240642 |
| p075 | Gemcitabine | >5000       | 0.2078726  | 0.28138315 |
| p075 | Irinotecan  | >10000      | 0.02647244 | 0.04487764 |
| p075 | Oxaliplatin | >100000     | 0.0436095  | -0.0276198 |
| p075 | Paclitaxel  | 1.892819871 | 0.0835769  | 0.12830437 |
| p089 | 5-FU        | 251531.3997 | 0.08558049 | 0.49399363 |
| p089 | Erlotinib   | 922.0088513 | 0.13006466 | -0.0137774 |
| p089 | Gemcitabine | 35.81715989 | 0.22061377 | 0.46113207 |
| p089 | Irinotecan  | 977.5070683 | 0.15028888 | 0.20595782 |
| p089 | Oxaliplatin | >100000     | -0.0249884 | 0.27850293 |
| p089 | Paclitaxel  | >500        | 0.11597065 | 0.32613667 |
| p080 | 5-FU        | >1000000    | 0.09077908 | 0.51859739 |
| p080 | Erlotinib   | >50000      | -0.0783702 | 0.07188214 |
| p080 | Gemcitabine | 20.8649001  | 0.24951906 | 0.61277687 |
| p080 | Irinotecan  | >10000      | 0.03039478 | 0.36440437 |
| p080 | Oxaliplatin | >100000     | 0.003941   | 0.25306581 |
| p080 | Paclitaxel  | 5.510331545 | 0.10973534 | 0.32181942 |
| p081 | 5-FU        | >1000000    | 0.07055395 | 0.53298704 |
| p081 | Erlotinib   | >50000      | 0.01549338 | -0.0058138 |
| p081 | Gemcitabine | 14.97655969 | 0.14573419 | 0.63626715 |
| p081 | Irinotecan  | >10000      | 0.0209675  | 0.15320225 |
| p081 | Oxaliplatin | >100000     | 0.02762664 | 0.25397809 |
| p081 | Paclitaxel  | 0.284162454 | 0.11372972 | 0.27265335 |
| p083 | 5-FU        | >1000000    | 0.02014913 | 0.35605688 |
| p083 | Erlotinib   | >50000      | -0.0973583 | 0.10536792 |

|      |             |             |            |            |
|------|-------------|-------------|------------|------------|
| p083 | Gemcitabine | >5000       | 0.13054216 | 0.35158251 |
| p083 | Irinotecan  | 105.8585452 | 0.06344216 | 0.27389683 |
| p083 | Oxaliplatin | >100000     | -0.1544317 | 0.09833047 |
| p083 | Paclitaxel  | 13.12520573 | 0.12646858 | 0.18154911 |
| p084 | 5-FU        | >1000000    | 0.06851155 | 0.4189277  |
| p084 | Erlotinib   | >50000      | -0.0763448 | 0.17680915 |
| p084 | Gemcitabine | 12.98464136 | 0.18186443 | 0.74926666 |
| p084 | Irinotecan  | >10000      | -0.0343899 | 0.23895617 |
| p084 | Oxaliplatin | >100000     | 0.00291628 | 0.43863125 |
| p084 | Paclitaxel  | >500        | -0.0496647 | 0.24797173 |
| p085 | 5-FU        | >1000000    | -0.0346051 | 0.27243095 |
| p085 | Erlotinib   | >50000      | -0.0557604 | 0.12157033 |
| p085 | Gemcitabine | >5000       | 0.17201665 | 0.49947793 |
| p085 | Irinotecan  | >10000      | 0.02570457 | 0.18306737 |
| p085 | Oxaliplatin | >100000     | 0.05034892 | 0.08555182 |
| p085 | Paclitaxel  | >500        | -0.0197087 | 0.1649811  |
| p100 | 5-FU        | >1000000    | 0.04424599 | 0.60997112 |
| p100 | Erlotinib   | >50000      | -0.1750589 | -0.070946  |
| p100 | Gemcitabine | >5000       | 0.07487828 | 0.31135496 |
| p100 | Irinotecan  | >10000      | 0.04757756 | 0.16417696 |
| p100 | Oxaliplatin | >100000     | -0.029211  | 0.19470804 |
| p100 | Paclitaxel  | 4.24225602  | 0.08465656 | 0.16116942 |

### Supplementary References:

1. Zhang, M. *et al.* Characterising cis-regulatory variation in the transcriptome of histologically normal and tumour-derived pancreatic tissues. *Gut* **67**, 521–533 (2018).
2. Moffitt, R. A. *et al.* Virtual microdissection identifies distinct tumor- and stroma-specific subtypes of pancreatic ductal adenocarcinoma. *Nat. Genet.* **47**, 1168–1178 (2015).
3. Collisson, E. A., Bailey, P., Chang, D. K. & Biankin, A. V. Molecular subtypes of pancreatic cancer. *Nat. Rev. Gastroenterol. Hepatol.* **16**, 207–220 (2019).
4. Szklarczyk, D. *et al.* STRING v11: Protein-protein association networks with increased coverage, supporting functional discovery in genome-wide experimental datasets. *Nucleic Acids Res.* **47**, D607–D613 (2019).
5. Saelens, W., Cannoodt, R., Todorov, H. & Saeys, Y. A comparison of single-cell trajectory inference methods. *Nat. Biotechnol.* **37**, 547–554 (2019).
6. Peng, J. *et al.* Single-cell RNA-seq highlights intra-tumoral heterogeneity and malignant progression in pancreatic ductal adenocarcinoma. *Cell Res.* (2019) doi:10.1038/s41422-019-0195-y.
